# Supplementary material for: Remote Sensing detectability of airborne Arctic dust
Source: Copernicus journal article supplement (doi:10.5194/egusphere-2024-1057), 2024-05-31
Supplement: Supplementary file 1 [file Local_dust_PSDs.xlsx]

## Sheet: D_eff_calcs
	Dln(D)	0.346574			dῆ	ssp(D) x	dṽ /	Ckok x vsp(D)	vsp(D)
					/dlnD	dῆ/dlnD	dlnD	x dῆ/dlnD	x dῆ/dlnD
i	ln(Di-)	Di-	Di	ln(Di)
1	-1.60944	0.2	0.237841	-1.43615	0.251189	0.01116	0.0003	0.00025545	0.00176954
2	-1.26286	0.282843	0.336359	-1.08958	0.316228	0.0280993	0.0009	0.000909601	0.00630095
3	-0.916291	0.4	0.475683	-0.743004	0.354813	0.0630558	0.0026	0.00288666	0.0199964
4	-0.569717	0.565685	0.672717	-0.39643	0.316228	0.112397	0.007	0.00727681	0.0504076
5	-0.223144	0.8	0.951366	-0.0498568	0.263027	0.186976	0.018	0.0171193	0.118588
6	0.12343	1.13137	1.34543	0.296717	0.234423	0.333284	0.046	0.043155	0.298941
7	0.470004	1.6	1.90273	0.64329	0.199526	0.567342	0.09	0.103891	0.719666
8	0.816577	2.26274	2.69087	0.989864	0.120226	0.683715	0.18	0.17706	1.22652
9	1.16315	3.2	3.80546	1.33644	0.08	0.909902	0.3	0.333239	2.3084
10	1.50972	4.52548	5.38174	1.68301	0.0446684	1.0161	0.5	0.526273	3.64558
11	1.8563	6.4	7.61093	2.02958	0.020893	0.950528	0.66	0.696235	4.82293
12	2.20287	9.05097	10.7635	2.37616	0.00794328	0.722761	0.7	0.748688	5.18628
13	2.54945	12.8	15.2219	2.72273	0.00125893	0.2291	0.21	0.335619	2.32488
14	2.89602	18.1019	21.5269	3.06931	5e-05	0.018198	0.021	0.0377017	0.261166
ò f(D) dlnD					0.766092	2.02143	0.948156	1.05022	7.27507
										VMD
					Deff = 3/2(v/s)		0.703578	0.779318	5.39846	6.50792
		A check: Deff = <D>w = ds / dln D				5.39846		% dif =	592.716
					<Deff>/2	0.389659
			l	0.5	<Xeff>	4.8966		CN	0.9539
								CV	12.62
			Conclusion					CKok	0.144359
			References

## Sheet: Deff_prolate_ellipsoid_comment
pr
						a	b	e	l	Sp	Vp	Dp
				Reference (sphere)		1.25	1.25	0	1	19.635	8.18123	5
				Maximum l frequency		0.75	0.5	0.745356	1.5	4.22955	0.785398	2.32061
						1.5	1	0.745356	1.5	16.9182	6.28319	4.64122
						3	2	0.745356	1.5	67.6729	50.2655	9.28244
					Comment
					References
